# Supplementary material
Source: publisher figshare collection journal article supplement (https://future-science-group.figshare.com/ndownloader/files/31096486)
Supplement: Supplementary file 1 [file 31096486]

**Supplemental Materials**

**Supplemental Figure 1.** **Kaplan–Meier curves of time to first SSE after the start of second-line therapy.** **(A)** Radium-223 cohort. **(B)** Alternative NHT cohort.

CI, Confidence interval; NE, Not estimable; NHT, Novel hormonal therapy; SSE, Symptomatic skeletal event.

**A**


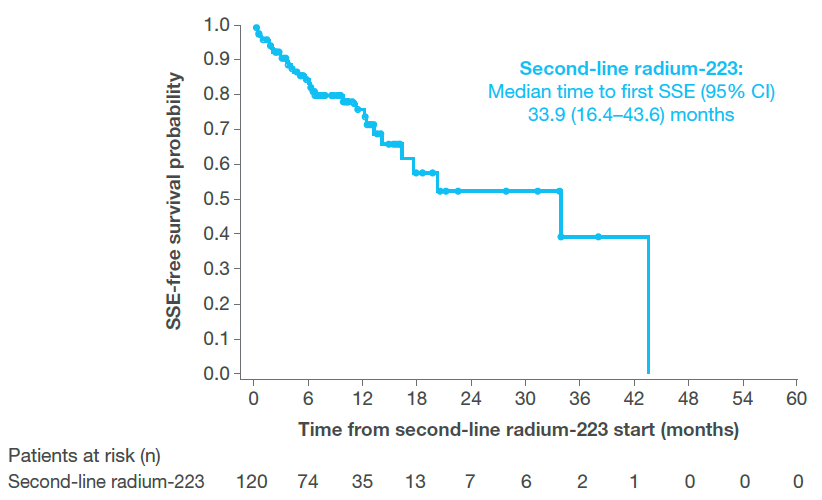


**B**

**
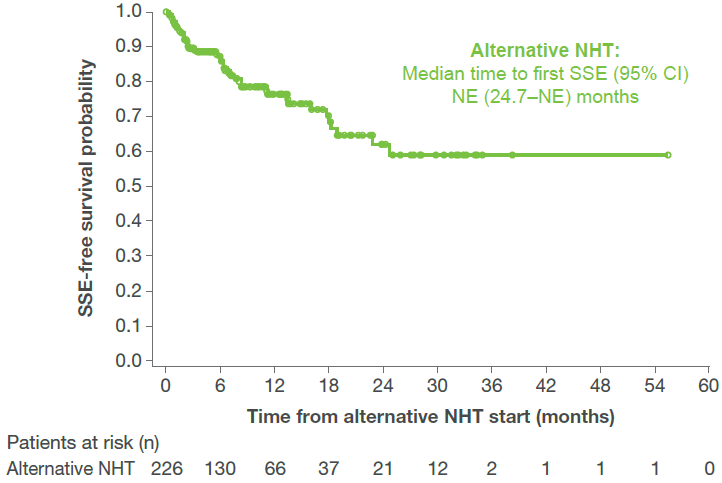
**
